# Supplementary material for: Botrytis cinerea G Protein β Subunit Bcgb1 Controls Growth, Development and Virulence by Regulating cAMP Signaling and MAPK Signaling
Source: MDPI journal article supplement (doi:10.3390/jof7060431), 2021-05-29
Supplement: s1 [file s1]

**Table S1.** Primers used in this study

| Primer   | Sequence(5'-3')                                                                                      | Relevant Characteristics                                                        |
|----------|------------------------------------------------------------------------------------------------------|---------------------------------------------------------------------------------|
| BcactA   | F:TCCAAACCGCCAGTCAATCC<br>R:GATACCACCGCTCTCAAGACC                                                    | qRT-PCR detection of the expression of <i>BcactA</i> (Liu <i>et al.</i> , 2011) |
| BCG1-BD  | F:TCAGAGGAGGACCTGCATATGATGGGTGCGGTA<br>TGAGCACT<br>R:TCGACGGATCCCCGGGAATTCTTAACGCCATGCT<br>GAATTAAG  | Amplification of full BCG1 for construction of the vector pGBKT7- BCG1          |
| BCG2-BD  | F:TCAGAGGAGGACCTGCATATGATGTGTTTCGGCA<br>GCAGGGAG<br>R:TCGACGGATCCCCGGGAATTCTCAAAGGATCAGC<br>TTTTGAAG | Amplification of full BCG2 for construction of the vector pGBKT7- BCG2          |
| BCG3-BD  | F:TCAGAGGAGGACCTGCATATGATGGGTGCTTGCA<br>TGAGCTC<br>R:TCGACGGATCCCCGGGAATTCTTAGAGTATGCCC<br>GAGTCTT   | Amplification of full BCG3 for construction of the vector pGBKT7- BCG3          |
| Bcgb1-BD | F:TCAGAGGAGGACCTGCATATGATGTCGTCAAACCT<br>CGAACGA<br>R:TCGACGGATCCCCGGGAATTCTTATGTGGACCAG<br>AGTTTGA  | Amplification of full bcbg1 for construction of the vector pGBKT7- Bcgb1        |
| Bcgb1-AD | F:CATATGGCCATGGAGGCCAGTATGTCGTCAAACCT<br>CGAACGA<br>R:GTATCGATGCCACCCGGGTGTTATGTGGACCAG<br>AGTTTGA   | Amplification of full bcbg1 for construction of the vector pGADT7- Bcgb1        |
| BCGG1-BD | F:TCAGAGGAGGACCTGCATATGATGCCTCAAGGTT<br>ATTCATCT<br>R:TCGACGGATCCCCGGGAATTCTTACATCACCAAA<br>CAGCATCC | Amplification of full BCGG1 for construction of the vector pGBKT7- BCGG1        |
| Bmp1-BD  | F:TCAGAGGAGGACCTGCATATGATGACAGCTCGTG<br>CGCCTAAT<br>R:TCGACGGATCCCCGGGAATTCCTATCTCATGATCT<br>CATCATA | Amplification of full Bmp1 for construction of the vector pGBKT7- Bmp1          |
| Bmp3-BD  | F:TCAGAGGAGGACCTGCATATGATGGCAGACCTGC<br>AAGGAAG<br>R:TCGACGGATCCCCGGGAATTCCTACGATCGCATA<br>GCATCCA   | Amplification of full Bmp3 for construction of the vector pGBKT7- Bmp3          |
| Pka1-BD  | F:TCAGAGGAGGACCTGCATATGATGCCGACACTCG<br>GTTTTTTG<br>R:TCGACGGATCCCCGGGAATTCTCATCGGGCCAC<br>CTTGACCA  | Amplification of full Pka1 for construction of the vector pGBKT7- Pka1          |
| Pka2-BD  | F:TCAGAGGAGGACCTGCATATGATGGCTGAGACCA                                                                 | Amplification of full Pka2 for                                                  |

|            |                                                                                                                  |                                                                                    |
|------------|------------------------------------------------------------------------------------------------------------------|------------------------------------------------------------------------------------|
|            | CGACGGCT<br>R:TCGACGGATCCCCGGGAATTCCTAAAAACCCTTG<br>AAACAATCATCG                                                 | construction of the vector<br>pGBKT7- Pka2                                         |
| Pde1-BD    | F:TCAGAGGAGGACCTGCATATGATGGAAGGTAGA<br>GCTCCCGCT<br>R:TCGACGGATCCCCGGGAATTCCTACAAATAAACA<br>CTCATCCC             | Amplification of full Pde1 for<br>construction of the vector<br>pGBKT7- Pde1       |
| Pde2-BD    | F:TCAGAGGAGGACCTGCATATGATGGACTACGCCG<br>CATGCAAC<br>R:TCGACGGATCCCCGGGAATTCTCAACCCGCAGTC<br>CCATCAGA             | Amplification of full Pde2 for<br>construction of the vector<br>pGBKT7- Pde2       |
| Bck1-BD    | F:TCAGAGGAGGACCTGCATATGATGAGCCAGCGTC<br>CCCAA<br>R:TCGACGGATCCCCGGGAATTCTTAATATGTGCCG<br>CGAATCTTAGC             | Amplification of full BcBck1<br>for construction of the vector<br>pGBKT7- Bck1     |
| BcMkk1-BD  | F:TCAGAGGAGGACCTGCATATGATGTCTTCTCCAG<br>CTCCATTA<br>R:TCGACGGATCCCCGGGAATTCTCACCAGCCCCAT<br>ACGGTAGC             | Amplification of full BcMkk1<br>for construction of the vector<br>pGBKT7- BcMkk1   |
| BcSte50-BD | F:TCAGAGGAGGACCTGCATATGATGGCATTGAGT<br>CCGGCACA<br>R:TCGACGGATCCCCGGGAATTCTCATATAATGCCG<br>CCAGGAGG              | Amplification of full BcSte50<br>for construction of the vector<br>pGBKT7- BcSte50 |
| BcSte50-AD | F:GTACCAGATTACGCTCATATGATGGCATTGAGTC<br>CGGCACA<br>R:ATGCCACCCGGGTGGAATTCTCATATAATGCCG<br>CCAGGAGG               | Amplification of full BcSte50<br>for construction of the vector<br>pGADT7- BcSte50 |
| BcSte11-BD | F:CTGATCTCAGAGGAGGACCTGCATATGATGGCAA<br>TGCTAGCTTCAAAG<br>R:TGCAGGTCGACGGATCCCCGGGAATTCTCAAGT<br>GATTGGGTTTAAAAA | Amplification of full BcSte11<br>for construction of the vector<br>pGBKT7- BcSte11 |
| BcSte7-BD  | F:CTGATCTCAGAGGAGGACCTGCATATGATGTCGG<br>ACGGTATTGGTTCG<br>R:TGCAGGTCGACGGATCCCCGGGAATTCTTATGAG<br>CCCTGAGCTGCATA | Amplification of full BcSte11<br>for construction of the vector<br>pGBKT7- BcSte7  |
| BD-jiance  | F: ATGGAGGAGCAGAAGCTG<br>R: TGCGGCCGCTGCAGGTCG                                                                   | PCR detection of<br>recombinant plasmids of<br>pGBKT7                              |
| AD-jiance  | F: ATGGAGTACCCATACGACGTA<br>R: TCGATGGATCCCGTATCGATG                                                             | PCR detection of<br>recombinant plasmids pGA<br>DT7                                |
| Bcgas2-RT  | F: TCGGTATCGGTGGTCTTTC<br>R: GTACTCAATCGCACGCTTC                                                                 | qRT-PCR detection of the<br>expression of <i>Bcgas2</i>                            |

|                   |                                                                                 |                                                                                    |
|-------------------|---------------------------------------------------------------------------------|------------------------------------------------------------------------------------|
|                   |                                                                                 | (Schamber et al 2010)                                                              |
| BcNoxA-RT         | F: ACTGCCCCATGCCAAAATTAG<br>R: CCTAAGCAATGACCCCAGAA                             | qRT-PCR detection of the expression of <i>BcNoxA</i> based on <i>Bcin05g00350</i>  |
| BcNoxD-RT         | F: AAGAATCTCGACGGTGCACT<br>R: AGCTGTCAAAGGGAGGACAA                              | qRT-PCR detection of the expression of <i>BcNoxD</i> based on <i>Bcin01g08690</i>  |
| BcLAE1-RT         | F: GATGAGAAAGACCGGATGGA<br>R: TAGCTAGGTCAAGCCCGAGA                              | qRT-PCR detection of the expression of <i>BcLAE1</i> based on <i>Bcin05g01210</i>  |
| Bcgb1-L           | F: TATTCCTGACAATCTCTGGCA<br>R: GCTGCAGGAATTTCGATATCAAGTTGCGACCAAA<br>TGGATGATAG | Gene deletion vector construction of <i>Bcgb1</i> based on <i>Bcgb1</i> and KS1004 |
| Bcgb1-R           | F: AAAGGAATAGAGTAGATGCCGAATCGCCCTCCC<br>AAATACG<br>R: ATTACAGAGCCTTAGTTATGAGTCC |                                                                                    |
| HY- <i>Bcgb1</i>  | F: CTATCATCCATTTGGTCGCAACTTGATATCGAAT<br>TCCTGCAGC<br>R: CTGCTCCATACAAGCCAACC   |                                                                                    |
| YG- <i>Bcgb1</i>  | F: TGTCTGCGGGTAAATAGC<br>R: CGTATTTGGGAGGGCGATTCCGCATCTACTCTAT<br>TCCTTT        |                                                                                    |
| <i>Bcgb1</i> sy-F | AGAATGACCAAGGCCAAGAGG                                                           | PCR detection of <i>Bcgb1</i> deletion mutant                                      |
| HYG               | F: GACAGCGTCTCCGACCTGA<br>R: GCTCCATACAAGCCAACCAC                               | Amplification of part sequence of HPT in the <i>Bcgb1</i> deletion mutant          |
| BcVEL1-RT         | F: CTTCTCTTCGCAACTTTGG<br>R: CAACTTGTATTGGCCCTCGT                               | qRT-PCR detection of the expression of <i>BcVEL1</i>                               |
| BcVEL2-RT         | F: CGAACATGGAATGTTTGTGC<br>R: GTGGCGCACTACCATAGGTT                              | qRT-PCR detection of the expression of <i>BcVEL2</i>                               |
| Bcbrn1-RT         | F: CCAAGAAGCAATGGGGTAAA<br>R: TCATGATCAAACGACCTCCA                              | qRT-PCR detection of the expression of <i>Bcbrn1</i>                               |
| Bcbrn2-RT         | F: GACTCTTGAGGGCAAAGTCG<br>R: TGCTACCGAGTTCCTCGATT                              | qRT-PCR detection of the expression of <i>Bcbrn2</i>                               |
| Bcsed1-RT         | F: TGACAGCTACGATGCAAAGG<br>R: GCCCTCAATTGATGATGTCC                              | qRT-PCR detection of the expression of <i>Bcsed1</i>                               |
| Bcsmr1-RT         | F: CGTCTCCAGGAAGCTCAATC<br>R: TTTTGTGGCGGAGAGAGAGT                              | qRT-PCR detection of the expression of <i>Bcsmr1</i>                               |
| Bcpks12-RT        | F: CTGATCTTCGTGGGGTTGTT<br>R: TGCCGCATTGATAGTAGCAG                              | qRT-PCR detection of the expression of <i>Bcpks12</i>                              |
| Bcpks13-RT        | F: AATGCAGCGTCTGGCTATCT<br>R: CACGCTGTATGATGGACCAC                              | qRT-PCR detection of the expression of <i>Bcpks13</i>                              |

|           |                                                        |                                                         |
|-----------|--------------------------------------------------------|---------------------------------------------------------|
| BcAtf1-RT | F: TGTCCCTCCACAAAACAACA<br>R: ACCGGTGAGCATGTTAGGAC     | qRT-PCR detection of the<br>expression of <i>BcAtf1</i> |
| Bac-RT    | F: CGACTGCGCTTAATACTACCG<br>R: TTATCCTCCCTTCCTACATCTTC | qRT-PCR detection of the<br>expression of <i>Bac</i>    |
| BcPde1-RT | F: CTCGCAGACCTCAAACCTTC<br>R: TACTCGCCAATCCAGCAAT      | qRT-PCR detection of the<br>expression of <i>BcPde1</i> |
| BcPde2-RT | F: TCACTTCCTCGTCCGCTTAG<br>R: GGGTGACCTACATCGTGGC      | qRT-PCR detection of the<br>expression of <i>BcPde2</i> |
| BcPka1-RT | F: TGCACAAGATGAAGCAGGTC<br>R: AGAATTTGGCCACTGGATTG     | qRT-PCR detection of the<br>expression of <i>BcPka1</i> |
| BcPka2-RT | F: GCTTGACTACTGCCCTGGAG<br>R: TATGTGTCCCTCAGCATCCA     | qRT-PCR detection of the<br>expression of <i>BcPka2</i> |
| BcPkaR-RT | F: CGTCCATGTCAATTCCACTG<br>R: AGGATTGCGCGGAAAGTTAT     | qRT-PCR detection of the<br>expression of <i>BcPkaR</i> |
